# Supplementary material
Source: Copernicus journal article supplement (doi:10.5194/wcd-7-1189-2026)
Supplement: Supplementary file 1 [file wcd-7-1189-2026-supplement.pdf]

Supplement of Weather Clim. Dynam., 7, 1189–1210, 2026  
<https://doi.org/10.5194/wcd-7-1189-2026-supplement>  
© Author(s) 2026. CC BY 4.0 License.

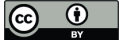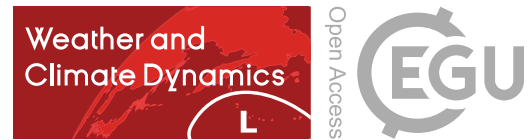

*Supplement of*

## **Curved atmospheric rivers and their moisture remnants: a new detection tool for Antarctica**

**Victoire Buffet et al.**

*Correspondence to:* Victoire Buffet ([victoire.buffet@univ-grenoble-alpes.fr](mailto:victoire.buffet@univ-grenoble-alpes.fr))

The copyright of individual parts of the supplement might differ from the article licence.

Supplement

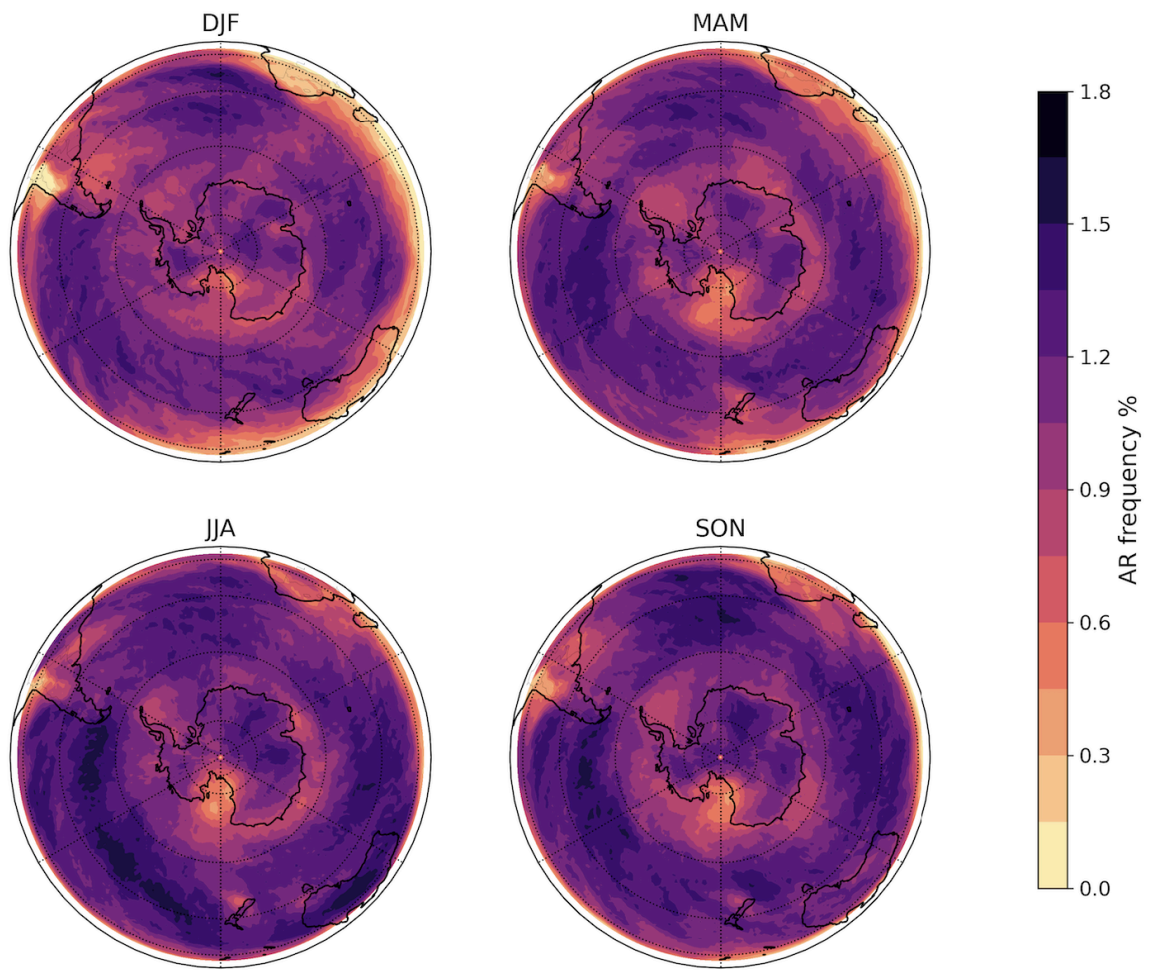

**Fig. S1.** Seasonal frequency of DARK ARs for all four austral seasons (DJF, MAM, JJA, SON).

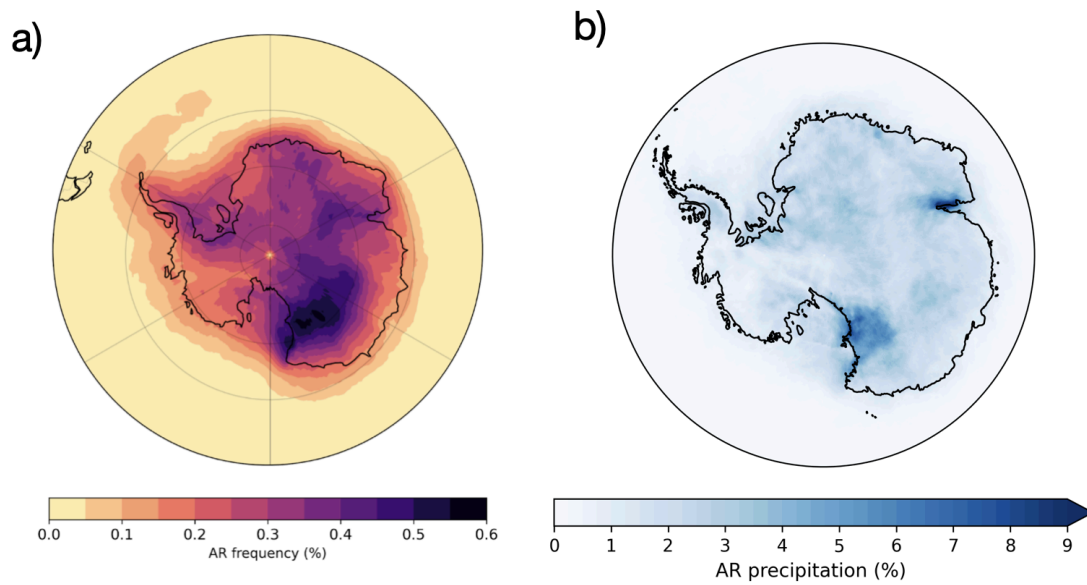

**Fig. S2.** (a) Frequency of DARK AR-children (similar to **Fig. 3**). (b) Share of total precipitation attributed to DARK AR-children (similar to **Fig. 5**).

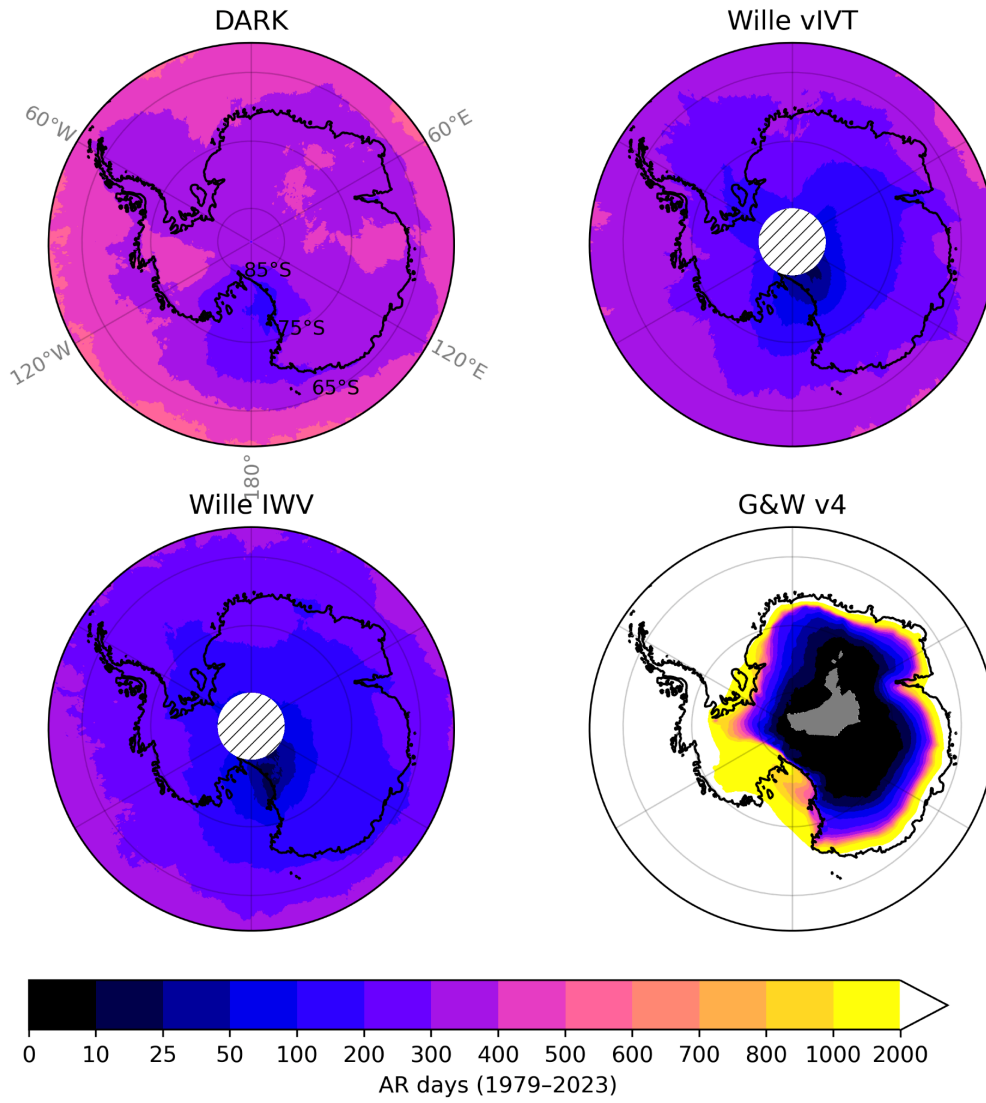

**Fig. S3.** Number of AR days across the 1979–2023 period for all ARDTs.

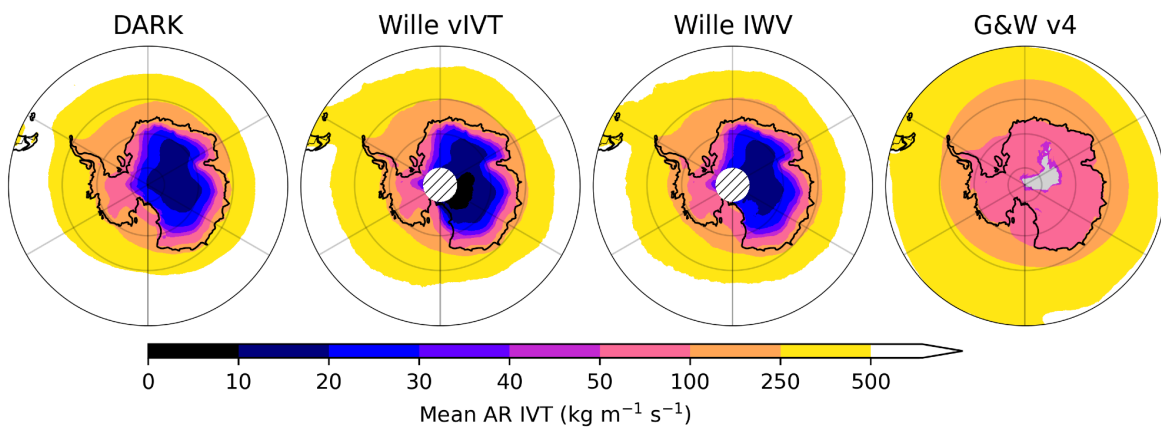

**Fig. S4.** Mean AR IVT for all ARDTs.

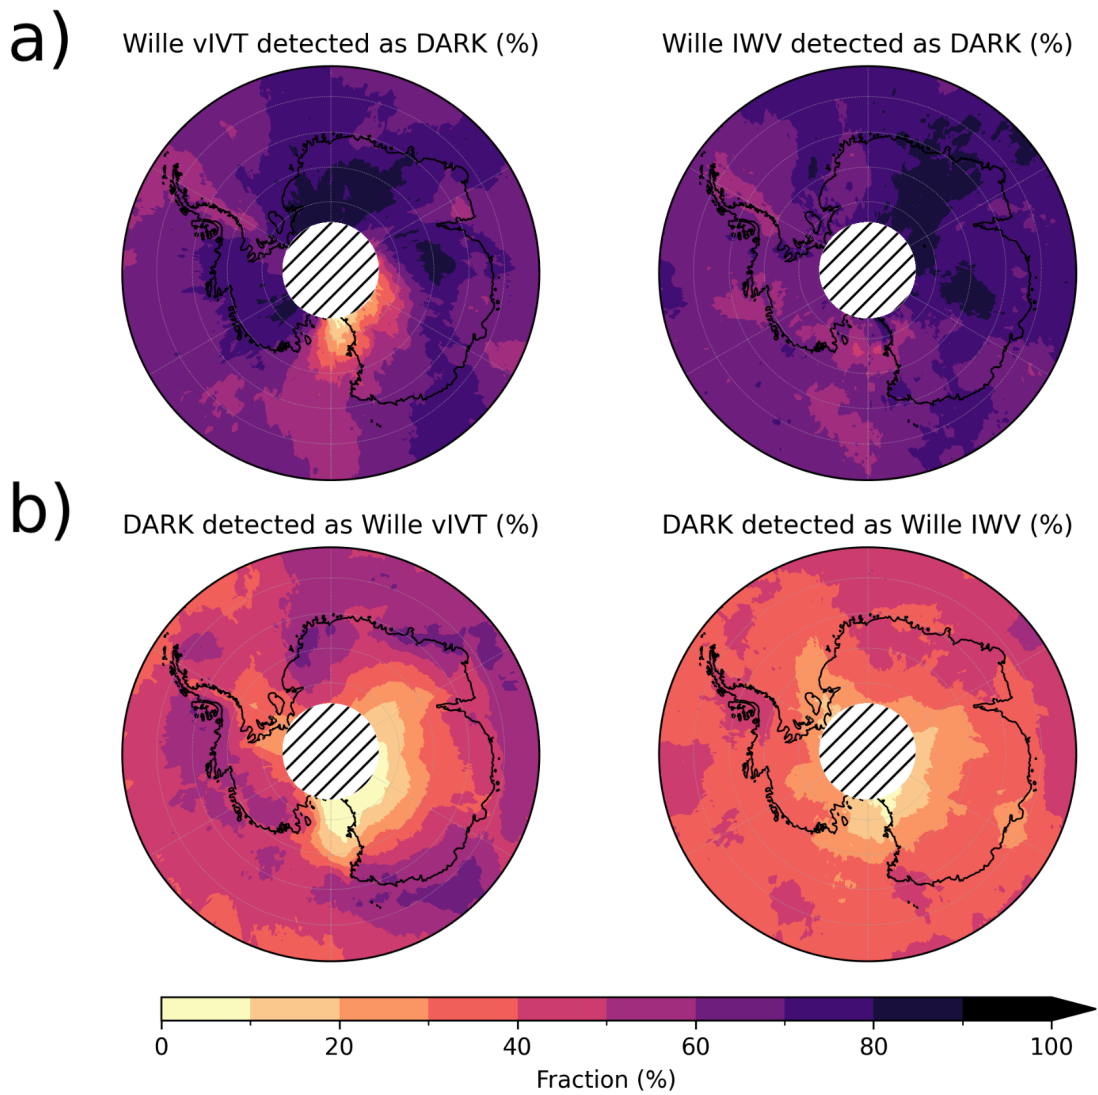

**Fig. S5.** Co-detection fractions between the DARK and Wille vIVT (left) and Wille IWV (right) catalogues. Panels show, for each grid point, the percentage of detections in one catalogue that have a corresponding detection in the other within a  $\pm 2^\circ$  latitude  $\times$   $\pm 5^\circ$  longitude neighbourhood. (a) Wille detections identified as DARK. (b) DARK detections identified as Wille. The area poleward of  $83^\circ$  S is masked (hatched) to avoid edge effects introduced by the  $\pm 2^\circ$  latitude neighbourhood near the pole.

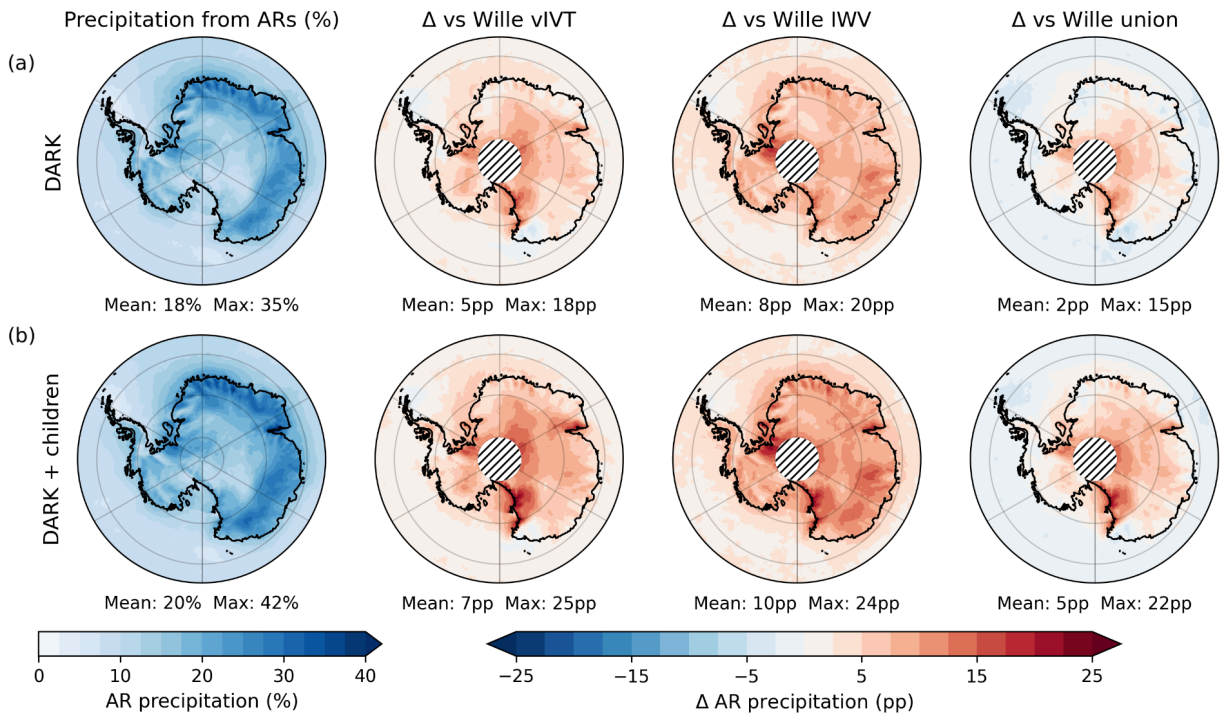

**Fig. S6.** Same as Fig. 5, but including the difference in AR-attributed precipitation relative to the combined Wille vIVT + IWV (“Wille union”) scheme. Antarctic land-only mean and maximum values are reported below each panel. Hatched white areas south of 85° S mark regions excluded from the Wille schemes.

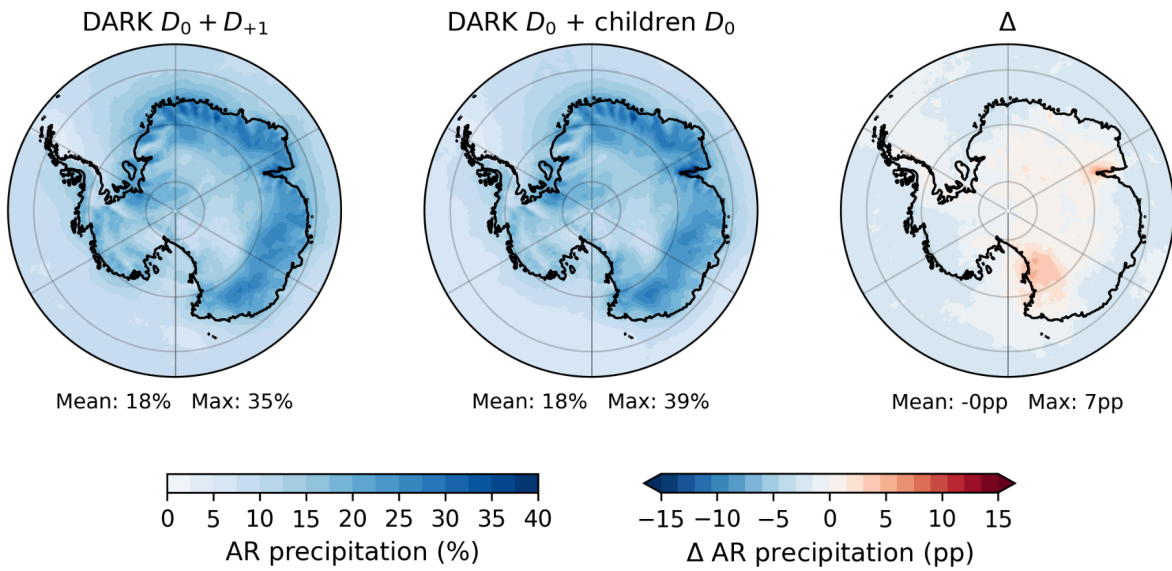

**Fig. S7.** Share of total precipitation attributed to (left) DARK ARs, including precipitation occurring on the day of landfall ( $D_0$ ) and the following day ( $D_{+1}$ ); (middle) DARK ARs and their children considering only the day of landfall ( $D_0$ ); and (right) their difference (middle – left).

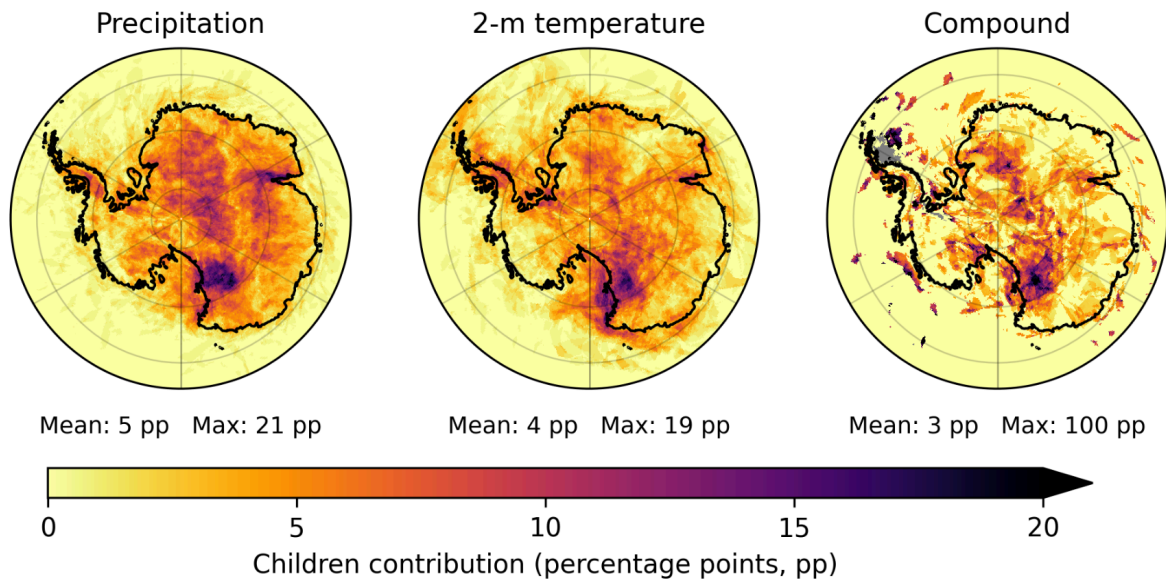

**Fig. S8.** Contribution of AR children to the fraction of 99th-percentile anomaly days associated with DARK ARs and their children (displayed in Fig. 7b, d and Fig. 8d).

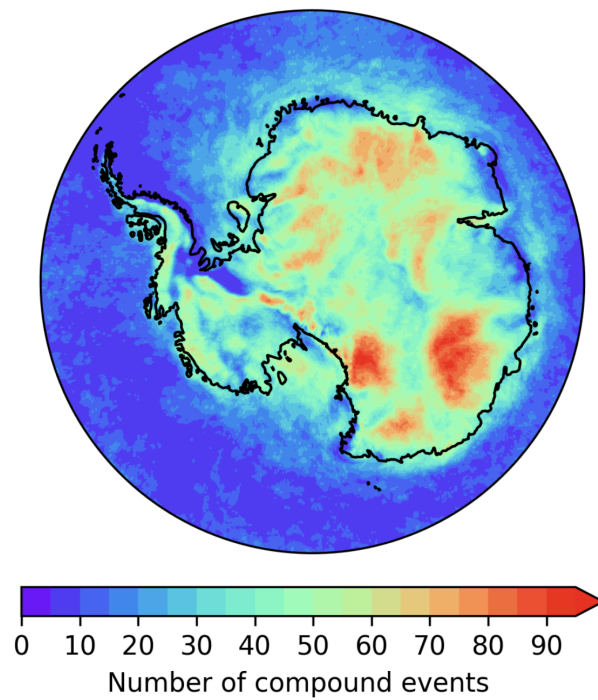

**Fig. S9.** Number of compound precipitation–temperature extreme events (Sect. 2.4) across Antarctica.
